# Supplementary material for: Biocompatible PVTF Coatings on Ti with Improved Bonding Strength
Source: MDPI journal article supplement (doi:10.3390/coatings13071224), 2023-07-08
Supplement: s1 [file s1]

# Biocompatible PVTF Coatings on Ti with Improved Bonding Strength

Weiming Lin <sup>1</sup>, Xuzhao He <sup>1</sup>, Xiaowei Guo <sup>2,\*</sup>, Dengfeng Xu <sup>3</sup> and Kui Cheng <sup>1,\*</sup>

<sup>1</sup> School of Materials Science and Engineering, State Key Laboratory of Silicon Materials, Center of Rehabilitation Biomedical Materials, Zhejiang University, Hangzhou 310027, China; 11926077@zju.edu.cn (W.L.); hf@zju.edu.cn (X.H.)

<sup>2</sup> Zhejiang Institute of Metrology, Key Laboratory of Acoustics and Vibration Precision Measuring Technology for State Market Regulation, Key Laboratory of Acoustics and Vibration Precision Measuring Technology of Zhejiang Province, Hangzhou 310018, China

<sup>3</sup> Zhejiang Construction Engineering Group Co., Ltd., Hangzhou 310013, China; xu\_deng\_feng@163.com

\* Correspondence: gxw229@126.com (X.G.); chengkui@zju.edu.cn (K.C.)

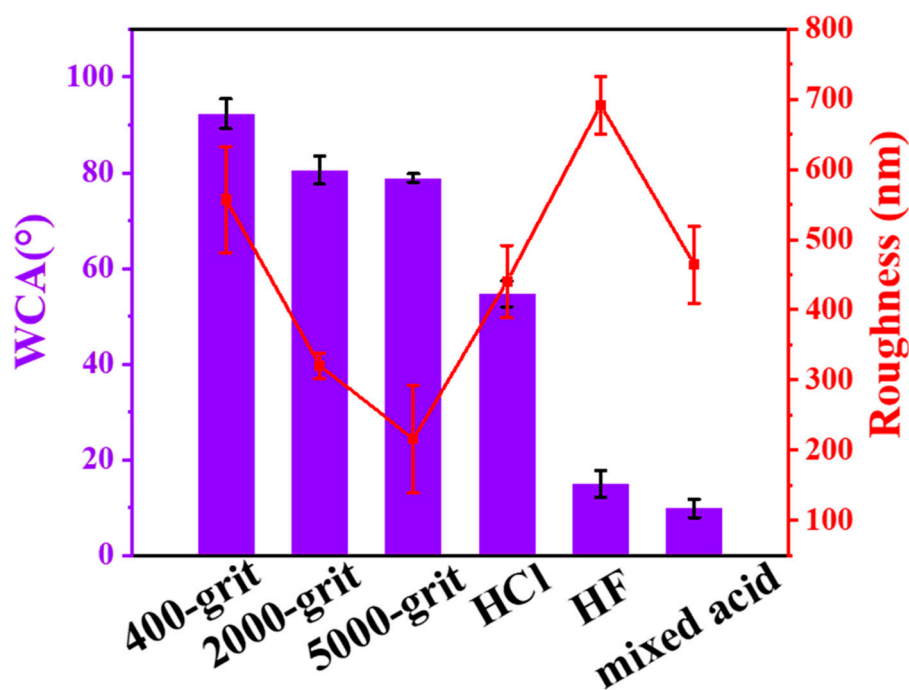

**Figure S1.** The distribution and fitting data for the roughness and static water contact angles estimation.
